1 **Main title**

2 Immunization Staff Training Needs Assessment: An Overview Of Findings From Cameroon

3 **Running title**

4 Immunization Staff Training Needs Assessment

5 **List of authors**

6 Amani Adidja<sup>1</sup>, Sangwe Clovis Nchinjoh<sup>2\*</sup>, Jessica Gu<sup>3</sup>, Fabrice Zobel Lekeumo Cheuyem<sup>1</sup>, Nadege

7 Nnang Edwige<sup>2</sup>, Marius Vouking<sup>5</sup>, Jude Nkwain Muteh<sup>6</sup>, Valirie Ndip Agbor<sup>7</sup>, Mbanga Clarence

8 Mvalo<sup>2</sup>, Nsah Bernard<sup>2</sup>, Budzi Michael Ngenge<sup>2</sup>, Shalom Tchokfe Ndoula<sup>4</sup>, Andreas Ateke Njoh<sup>6</sup>,

9 Pietro Di Mattei<sup>5</sup>, Calvin Tonga<sup>6</sup>, Yauba Saidu<sup>2,8</sup>

10 **Affiliations**

11 1. Faculty of Medicine and Biomedical Sciences, University of Yaoundé 1, Yaoundé, Cameroon

12 2. Clinton Health Access Initiative Inc., Yaounde P.O. Box 2664, Cameroon

13 3. Global Vaccine Team, Clinton Health Access Initiative Inc., Boston, MA 02127, USA;

14 4. Cameroon Ministry of Public Health, Yaoundé PO Box 2084, Cameroon

15 5. Centre pour le Développement des Bonnes Pratiques en Santé, Hôpital Central de  
16 Yaoundé, Henri-Dunant Avenue, Messa, Yaoundé, Cameroun.

17 6. Gavi, the Vaccine Alliance, Geneva, Switzerland

18 7. Clinical Trial Service Unit and Epidemiological Studies Unit (CTSU), Nuffield Department of  
19 Population Health, University of Oxford, Oxford, UK

20 8. Institute for Global Health, University of Siena, 53100 Siena, Italy

21 **Corresponding author\***

22 E-mail: [nsclouis@clintonhealthaccess.org](mailto:nsclouis@clintonhealthaccess.org) (SCN)

23

24 **Abstract**

25 **Background:**

26 In recent years, Cameroon's Expanded Program on Immunization (EPI) has witnessed a sizable decline

27 in its performance. Many stakeholders have cited weaknesses in human resources as one of the major  
NOTE: This preprint reports new research that has not been certified by peer review and should not be used to guide clinical practice.

28 drivers for the observed trend. In a bid to better understand and redress this situation, the EPI and its  
29 partners conducted a Training Needs Assessment (TNA) among central, regional, and district staff. The  
30 assessment aimed to quantify and characterize core capability gaps and leverage the findings to design  
31 an evidence-based capacity-building plan.

32 **Methods:** A descriptive cross-sectional study was conducted using aggregated data from a survey  
33 carried out among EPI staff from May to September 2016 across Cameroon's health pyramid - central,  
34 regional, and district levels; and analysis was done using Microsoft Office Excel 2016.

35 **Results:** Over half of EPI staff had worked for less than three years in their current post, and roughly  
36 three-third of them did not receive pre-service training on vaccination. Additionally, about half of them  
37 had not received any form of in-service training on immunization. Supportive supervision was the most  
38 frequently cited topic for training, with a surprisingly higher need at the central level (80%). Financial  
39 incentive was not a primary motivating factor for learning. Approximately half of the respondents at all  
40 levels were not aware of onboarding materials. Most of the respondents identified multiple meetings,  
41 high staff turnover, and competing priorities as major barriers to learning. Only about half of surveyed  
42 staff reported participating in performance reviews, with nearly half of these reviews conducted when  
43 an opportunity arose.

#### 44 **Conclusion:**

45 There are still many gaps challenging the EPI goal achievement in Cameroon. Sustainably addressing  
46 these issues will require a comprehensive framing of capability-building activities. High-quality EPI  
47 human resources will boost the country's vaccination performance and contribute to the reduction of  
48 infant mortality in the country.

49 **Keywords:** Training Need Assessment, Vaccination, Expanded Program on Immunization Staff

50

51

#### 52 **Background**

53 Globally, immunization has been a remarkable tool for reducing morbidity and mortality among  
54 children since the creation of the Expanded Program on Immunization (EPI) in 1974 [1]. Many  
55 countries including Cameroon, a country in Central Africa, over the years have made significant

56 progress in achieving critical vaccination targets. Indeed, Cameroon reported a significant rise in  
57 vaccination coverage for the 1<sup>st</sup> and 3<sup>rd</sup> doses of the Diphtheria-Tetanus-Pertussis containing vaccines  
58 (DTP) from 54% and 62% in 2000 to 88.6 % and 95% in 2013, respectively[2]. This steady increase  
59 of over 30 points has been arguably due to consistent political will and commitment towards infant  
60 health, a high social acceptance rate, financial and technical support from development partners, and  
61 the implementation of the Reach Every District (RED) strategy [3], amongst others.

62 Despite this promising rise in vaccination coverage, in recent years, vaccination coverage in Cameroon  
63 has stalled with occasional progressive decline in performance down to 76% and 69% for DTP-1 and  
64 DTP-3, respectively, in 2021[2]. Among other things, anecdotal evidence suggests that this may have  
65 been a direct effect of new challenges faced by the program. This includes the need to expand and  
66 sustain coverages, close equity gaps dramatically, meet the demands of a rapidly rising birth cohort and  
67 urbanization[4], introduce new vaccines [5], and aggressively pursue accelerated global and regional  
68 disease control targets[6, 7].

69 To effectively deal with the immunization challenges of the 21st century, the EPI and its partners  
70 conducted several vertical vaccination system assessments and leveraged the findings to implement  
71 tailored interventions to close identified gaps. Although the implementation of these actions yielded  
72 positive results, the outcome is arguably limited by capacity gaps among EPI staff. Indeed, data from  
73 the 2016 national cold chain inventory showed that only 12.2% of the 9,661 surveyed staff had received  
74 training on immunization within the previous five years, a finding which is somewhat consistent with  
75 the 16% reported in 2013 [8]. This situation, coupled with a lack of updated reference documents, high  
76 staff attrition, and the absence of a robust onboarding system, have created significant capacity gaps  
77 among EPI staff at all health pyramid levels. As a result, many EPI staff, including logisticians,  
78 storekeepers, data managers, and vaccinators, lack the required skills to effectively do their job.

79 Although the EPI has invested significant efforts to address these challenges, five system issues have  
80 hindered progress toward building a competent workforce. First, the current training methods (notably,  
81 off-site classroom training) are mostly based on theoretical/didactical materials that are not always  
82 adapted to the Cameroonian context and that are delivered by instructors who are not sufficiently trained  
83 on the content. In addition, there are often no post-training follow-ups to ensure that training translates

84 into improved performance. Secondly, there is often poor coordination of training between partners and  
85 the government, leading to poor training quality control and sometimes duplication of efforts. Third,  
86 partners often fund training activities, implying that capability-building activities can stall if partner  
87 funding evaporates. Fourth, the current training system is not viewed as a continuum to the extent that  
88 there are no clear links from pre-service to in-service to on-the-job training. Lack of this perspective  
89 often results in one-off training, which is driven by available funding for training of interest (e.g., new  
90 vaccines or technology introductions). Finally, there is no monitoring and evaluation system to track  
91 who has received/has not received training as well as knowledge utilization.

92 There is a need to establish a comprehensive capability program that can sustainably address current  
93 and future system challenges, including the high numbers of untrained staff, high staff turnover, and  
94 fast-paced and evolving technology. The first step towards establishing such a program necessitated the  
95 conduct of a Training Needs Assessment (TNA) to quantify and characterize existing knowledge and  
96 skills gaps among EPI staff at all system tiers. In this paper, we present the findings of our study that  
97 assessed existing capability needs among EPI staff and proposed strategies that can be leveraged to  
98 address the identified gaps to inform actions or interventions from policymakers, funders, and other  
99 interested immunization stakeholders.

## 100 **Methods**

### 101 *Study design and setting:*

102 A descriptive cross-sectional study was conducted using aggregated data from a survey carried out  
103 among EPI staff from May to September 2016 across Cameroon's health pyramid - central, regional,  
104 and district levels to establish vaccination training needs.

### 105 *Study population and sampling:*

106 Our study was based on aggregated data unveiled by the survey conducted from May to September  
107 2016 among EPI staff from central, regional, and district levels of Cameroon's health pyramid. For the  
108 purpose of research, this data was accessed in March 7<sup>th</sup>, 2023 and authors did not have access to  
109 information that could identify individual participants. The aggregated data contained a summary  
110 outcome of interviews of staff at central and regional levels, excluding non-technical staff such as

111 drivers, cleaners, and security personnel. At the district level, available data was on staff considered  
112 during the survey through purposive sampling to assure proportional distribution rather than obtaining  
113 high precision. The aggregated data represents the view 28 EPI staff at central level, 52 at regional and  
114 162 at district-level from 68 out of 200 health districts in Cameroon.

#### 115 *Inclusion and Exclusion criteria*

116 All data from the need assessment survey conducted in 2016 representing the view of technical staff  
117 working in the immunization space at the three target levels (central, regional, and districts) was  
118 considered. At the national level, this included staff from all existing functional departments, including  
119 the EPI manager and deputy, and staff from the following departments: administration and finance,  
120 routine immunization and logistics, data management, monitoring and evaluation, and communication  
121 for development. At the regional level, it included the regional EPI leads, logisticians, data managers,  
122 and surveillance and communication officers. At the district level, the district medical officers, the chief  
123 of the health bureau, and EPI focal staff were included in the final analysis. At all levels, we excluded  
124 support staff such as drivers, security guards, cleaners, and those working at the secretariats without a  
125 defined role as well as technical staff who did not participate in the survey.

#### 126 *Data collection and procedure*

127 A structured excel based tool was used to extract information from aggregated data on the need  
128 assessment survey. The final tool consisted of eight sections, including basic demographic information,  
129 vaccine-specific training, core skills and competencies, the preferred format of learning, motivational  
130 factors for learning, managers' views on the current skill levels of staff under their command, human  
131 resource onboarding system at each level and skill/knowledge assessment on key immunization  
132 program concepts and practices.

#### 133 *Data processing and analysis*

134 Once the extraction was completed, it was assessed for accuracy and completeness and cleaned. Data were  
135 then exported, processed, and analyzed using Microsoft Office Excel version 2016. Results were  
136 presented using frequency and percentages for the various variables of interest.

#### 137 **Results**

138 Overall, the aggregated data represents the view of 28 EPI staff at central level, 52 at regional and 162  
 139 at district-level from 68 out of 200 health districts in Cameroon. The majority of people working in EPI  
 140 had less than three years of experience in their current posts, as shown in Table 1. Moreso, our findings  
 141 showed that approximately half of the respondents at all levels (central: 55%; regional: 46%, and  
 142 district: 49%) were not aware of onboarding materials for a new staff. In addition, most respondents  
 143 had not received any form of pre-service training, notably 79 % at the central, 72 % at the regional, and  
 144 60 % at the district levels. Also, about half of the respondents at the district (50%), region (37%) and  
 145 central levels (58%) had not received in-service training (Table 2).

146 **Table 1:** Staff professional experience across the three administrative levels of the EPI in Cameroon,  
 147 2016

| Professional experience*        | EPI level |          |         | Total    |
|---------------------------------|-----------|----------|---------|----------|
|                                 | n (%)     |          |         |          |
|                                 | District  | Regional | Central |          |
|                                 | n=162     | n=52     | n=28    | n=242    |
| <b>In all sectors</b>           |           |          |         |          |
| < 3 years                       | 10 (6)    | 2 (4)    | 2 (8)   | 14 (6)   |
| 3-6 years                       | 36 (22)   | 5 (10)   | 16 (58) | 57 (24)  |
| >6 years                        | 116 (72)  | 45 (76)  | 10 (34) | 171 (70) |
| <b>In immunization services</b> |           |          |         |          |
| < 3 years                       | 21 (13)   | 7 (14)   | 15 (54) | 42 (18)  |
| 3-6 years                       | 45 (28)   | 16 (30)  | 9 (31)  | 70 (29)  |
| >6 years                        | 96 (59)   | 29 (56)  | 4 (15)  | 129 (53) |

\*Professional experience was defined as the total number of years an individual has worked following graduation from a training institution/university excluding internships.

148

149 **Table 2:** Distribution of EPI staff according to the type of training received on immunization, 2016

| Type of training received on immunization | EPI level     |              |              | Total         |
|-------------------------------------------|---------------|--------------|--------------|---------------|
|                                           | <i>n</i> (%)  |              |              |               |
|                                           | District      | Regional     | Central      |               |
|                                           | <i>n</i> =162 | <i>n</i> =52 | <i>n</i> =28 | <i>n</i> =242 |
| <b>Pre-service</b>                        |               |              |              |               |
| No                                        | 97 (60)       | 37 (72)      | 22 (79)      | 156 (64)      |
| Yes                                       | 52 (32)       | 12 (24)      | 5 (17)       | 69 (29)       |
| Can't remember                            | 13 (8)        | 3 (4)        | 1 (4)        | 17 (7)        |
| <b>In-service</b>                         |               |              |              |               |
| No                                        | 81 (50)       | 19 (37)      | 15 (58)      | 115 (48)      |
| Yes                                       | 73 (45)       | 32 (61)      | 13 (42)      | 118 (49)      |
| Can't remember                            | 8 (5)         | 1 (2)        | 0            | 9 (3)         |

150

151 As shown in Table 3, cold chain logistics was the most covered topic during in-service training of EPI  
 152 staff - 90 % of district, 83 % of regional, and 54 % of central- level EPI staff received in-service training  
 153 on this subject. Other important topics including but not limited to Adverse events following  
 154 immunization (AEFI), surveillance of vaccine-preventable diseases, conducting coverage surveys or  
 155 Supplementary Immunization Activities were less prioritized for training. On the other hand, cross-  
 156 disciplinary skills necessary for day-to-day operations seem not to receive sufficient attention during  
 157 in-service training at all levels; for instance, less than half of district and regional staff received training  
 158 on planning, budgeting, and report writing.

159 **Table 3:** Distribution of EPI staff according to the type of topic covered during in-service training by  
 160 level, 2016

| Topic | EPI level    |          |         | Total         |
|-------|--------------|----------|---------|---------------|
|       | <i>n</i> (%) |          |         |               |
|       | District     | Regional | Central | <i>n</i> =118 |
|       |              |          |         |               |

|                                                  | <i>n</i> =73 | <i>n</i> =32 | <i>n</i> =13 |          |
|--------------------------------------------------|--------------|--------------|--------------|----------|
| <b>Core immunization topic</b>                   |              |              |              |          |
| Cold chain logistics                             | 66 (90)      | 27 (83)      | 7 (54)       | 100 (85) |
| Adverse events following immunization            | 57 (78)      | 20 (63)      | 0            | 77 (65)  |
| Surveillance of vaccine preventable disease      | 55 (75)      | 20 (63)      | 0            | 75 (64)  |
| Vaccine immunology                               | 38 (52)      | 17 (53)      | 4 (31)       | 59 (50)  |
| Community engagement                             | 44 (60)      | 22 (70)      | 0            | 66 (56)  |
| Conducting supplementary immunization activities | 32 (44)      | 16 (50)      | 0            | 48 (41)  |
| Conducting EPI Survey                            | 38 (52)      | 17 (53)      | 4 (31)       | 59 (50)  |
| Supportive supervision                           | 54 (74)      | 26 (80)      | 1 (10)       | 81 (68)  |
| Monitoring and evaluation                        | 51 (70)      | 19 (60)      | 0            | 70 (59)  |
| <b>Other competencies (soft skills)</b>          |              |              |              |          |
| Planning (including microplanning)               | 31 (43)      | 31 (60)      | 0            | 62 (52)  |
| Preparing proposals and report writing           | 23 (32)      | 16 (30)      | 0            | 39 (33)  |
| Use of Excel, Word, or PowerPoint                | 17 (23)      | 26 (50)      | 0            | 43 (36)  |
| Data management, reporting or analysis           | 38 (52)      | 36 (70)      | 0            | 74 (63)  |
| Budgeting & financing                            | 21 (29)      | 22 (43)      | 0            | 43 (36)  |

161

162 *Preferred areas of training: Core immunization topics and transferable skills*

163 Respondents indicated the need for training in all thematic areas but with varying frequency across  
 164 themes and levels. Supportive supervision was the most frequently sorted topic for training, with a  
 165 higher need expressed at the central level (80%). District and regional staff considered adverse events  
 166 following immunization (AEFI), maintenance of cold chain equipment, stock management and  
 167 distribution, and community engagement as critical areas where training is needed. Moreso, Over 50%



168 of staff at all levels expressed the need to be trained in preparing reports, creating work plans, delegating  
 169 tasks, time management, data analysis, and preparing PowerPoint Presentations. Similarly, over half of  
 170 the respondents at all levels expressed interest in gaining skills in core aspects of managing  
 171 teams/working in teams. Furthermore, over 40% of respondents at all levels highlighted the need to  
 172 learn how to account for project-related expenditures/expenses (Table 4).

173

174 **Table 4:** Preferred areas for training on cross-disciplinary skills among Cameroon EPI staff, 2016

| Preferred transferable skill    | EPI level                 |                          |                         | Total<br><i>n</i> (%) |
|---------------------------------|---------------------------|--------------------------|-------------------------|-----------------------|
|                                 | <i>n</i> (%)              |                          |                         |                       |
|                                 | District<br><i>n</i> =152 | Regional<br><i>n</i> =45 | Central<br><i>n</i> =30 |                       |
| <b>Oral communication</b>       |                           |                          |                         |                       |
| Communication in public         | 87 (57)                   | 30 (66)                  | 20 (65)                 | 137 (60)              |
| Negotiation and advocacy        | 59 (39)                   | 11 (24)                  | 14 (46)                 | 84 (37)               |
| Mentoring                       | 49 (32)                   | 10 (22)                  | 7 (23)                  | 66 (29)               |
| Training/teaching skills        | 68 (45)                   | 19 (43)                  | 11 (35)                 | 98 (43)               |
| <b>Written communication</b>    |                           |                          |                         |                       |
| Report writing                  | 100 (66)                  | 35 (78)                  | 20 (65)                 | 155 (68)              |
| Academic/research writing       | 35 (23)                   | 9 (21)                   | 13 (44)                 | 57 (25)               |
| Proposal/grant writing          | 24 (16)                   | 7 (15)                   | 11 (38)                 | 42 (19)               |
| Email communication             | 73 (48)                   | 26 (58)                  | 21 (69)                 | 120 (53)              |
| Formal memos/Government letters | 50 (33)                   | 22 (49)                  | 20 (65)                 | 92 (41)               |
| <b>Project management</b>       |                           |                          |                         |                       |
| Creating budgets                | 35 (23)                   | 17 (37)                  | 16 (54)                 | 68 (30)               |
| Monitoring budgets              | 38 (25)                   | 21 (46)                  | 14 (46)                 | 73 (32)               |
| Creating workplans              | 90 (59)                   | 27 (61)                  | 19 (62)                 | 136 (60)              |

|                                                        |         |         |         |          |
|--------------------------------------------------------|---------|---------|---------|----------|
| Monitoring workplans                                   | 84 (55) | 27 (60) | 16 (52) | 127 (56) |
| Creating monitoring and evaluation plans               | 73 (48) | 13 (29) | 16 (52) | 102 (45) |
| Accounting for expenditures/expenses                   | 62 (41) | 20 (44) | 12 (40) | 94 (41)  |
| <b>Managing and working with teams</b>                 |         |         |         |          |
| Delegating tasks to others (productive task shifting)  | 76 (50) | 22 (50) | 19 (62) | 117 (52) |
| Handling team challenges and conflicts                 | 62 (41) | 16 (36) | 21 (69) | 99 (44)  |
| Juggling multiple activities/time management           | 90 (59) | 24 (54) | 17 (58) | 131 (58) |
| Providing feedback to team members                     | 88 (58) | 25 (56) | 21 (69) | 134 (59) |
| Identifying poor performers and supporting improvement | 82 (54) | 26 (58) | 13 (42) | 121 (53) |
| <b>Data analysis and use</b>                           |         |         |         |          |
| Analysing data, making graphs, charts and tables       | 81 (53) | 24 (53) | 14 (46) | 119 (52) |
| Using Excel, Access and/or other databases             | 53 (35) | 14 (31) | 11 (35) | 78 (34)  |
| Interpreting data and making decisions                 | 99 (65) | 28 (63) | 16 (52) | 143 (63) |
| Turning data evidence into action plans                | 71 (47) | 15 (33) | 16 (52) | 102 (45) |
| <b>Designing knowledge products</b>                    |         |         |         |          |
| Creating PowerPoint Presentations                      | 74 (49) | 26 (58) | 15 (50) | 115 (51) |
| Creating research/survey protocols & tools             | 27 (18) | 6 (14)  | 11 (35) | 44 (19)  |
| Creating job aids and/or training materials            | 49 (32) | 12 (27) | 1 (4)   | 62 (27)  |
| Creating advocacy materials                            | 29 (19) | 7 (16)  | 11 (38) | 47 (21)  |

175

176 *Key challenges and drivers of learning*

177 Surveyed staff largely aligned on four key factors that could impact learning – multiple meetings, high

178 staff attrition, competing priorities, and team conflict (Table 5). With regards to motivation, financial

179 incentive to learn was not among the leading motivation factors for all levels, contrary to what was  
180 previously thought. Other factors, such as obtaining a certificate of completion, being recognized by  
181 the ministry, and consideration for promotion or attending an international meeting, received better  
182 ratings than financial incentives at all levels. Classroom learning at the workplace and On-the-job  
183 mentorship and direct supervision were the top preferred learning methods in this study.  
184

186 **Table 5:** Self-reported factors that could enhance learning among Cameroon EPI staff, 2016

187

| Factor enhancing learning                                                | EPI level     |              |              | Total         |
|--------------------------------------------------------------------------|---------------|--------------|--------------|---------------|
|                                                                          | <i>n</i> (%)  |              |              |               |
|                                                                          | District      | Regional     | Central      |               |
|                                                                          | <i>n</i> =162 | <i>n</i> =52 | <i>n</i> =28 | <i>n</i> =242 |
| <b>Most motivational factor for learning/gaining new skills</b>          |               |              |              |               |
| Financial incentive                                                      | 68 (42)       | 19 (36)      | 8 (27)       | 95 (39)       |
| Certificate of completion                                                | 91 (56)       | 34 (66)      | 8 (27)       | 133 (55)      |
| Recognition from high level Ministry officials                           | 89 (53)       | 29 (55)      | 15 (55)      | 133 (55)      |
| Potential consideration for promotion                                    | 81 (50)       | 37 (71)      | 5 (18)       | 123 (51)      |
| Potential for consideration for international meeting                    | 102 (63)      | 37 (71)      | 10 (36)      | 149 (62)      |
| Positive performance job review                                          | 63 (39)       | 21 (41)      | 10 (36)      | 94 (39)       |
| <b>Preferred format of learning to gain skills</b>                       |               |              |              |               |
| Self-paced and facilitated e-learning on a computer                      | 13 (8)        | 3 (6)        | 0            | 16 (7)        |
| Self-paced printed resource material/book                                | 29 (18)       | 5 (10)       | 4 (14)       | 38 (16)       |
| Classroom learning at the workplace                                      | 31 (19)       | 11 (21)      | 5 (17)       | 47 (19)       |
| Off-site Classroom learning                                              | 26 (16)       | 9 (17)       | 4 (16)       | 39 (16)       |
| On-the-job mentorship and direct supervision                             | 24 (15)       | 11 (21)      | 6 (21)       | 41 (17)       |
| On-the-job quick reference material/job aids                             | 18 (11)       | 5 (10)       | 4 (15)       | 27 (11)       |
| <b>Key challenges staff feel could impact learning at the work place</b> |               |              |              |               |
| Multiple meeting                                                         | 96 (59)       | 16 (30)      | 24 (87)      | 136 (56)      |
| High staff attrition rate                                                | 76 (47)       | 19 (37)      | 20 (70)      | 115 (48)      |
| Competing priorities                                                     | 50 (31)       | 25 (48)      | 20 (70)      | 95 (39)       |

Team conflict 21 (13) 7 (13) 4 (13) 32 (13)

---

*EPI: Expanded Program of Immunization.*

188 **Discussion**

189 In this study, the majority of people working in EPI had less than three years of experience in their  
190 current posts (Table 1), with approximately half of the respondents not aware of onboarding materials  
191 for new staff. This observation suggests high staff turnover, highlighting the need to strengthen the use  
192 of onboarding materials which is critical to sustainability following EPI-related capacity-building  
193 efforts. Robust onboarding can dramatically improve the performance and readiness of a person who  
194 takes on a new role in the health system. Onboarding helps build and sustain high-performing staff and  
195 maintains institutional knowledge. Therefore, onboarding materials are an essential tool of a well-  
196 functioning health system that can retain knowledge as staff changes[9]. The sub-optimal use of  
197 onboarding material despite high staff turnover arguably contributes significantly to the rising number  
198 of zero-dose and under-immunized children in Cameroon. This finding is consistent with a study  
199 conducted by Emily and colleagues in Tchad and Cameroon, which highlighted the role of rapid staff  
200 turnover in implementing Gavi's health system strengthening support in both countries[10].

201 Moreso, the low vaccination capacity gap of EPI staff stemming from rapid staff turnover is further  
202 compounded by sub-optimal pre-service and in-service training at all health system levels (Table 2).  
203 This finding suggests that limited attention is being accorded to immunization in the curricula of nursing  
204 and medical schools (pre-service training). This is consistent with a study conducted at health training  
205 institutions in 12 target countries which suggested incomplete or outdated pre-service curricula,  
206 insufficient time allocation, and insufficient knowledge of the current EPI theory and practice by  
207 lecturers[11]. Redressing this situation will, therefore, require high-level advocacy and negotiations  
208 between the Ministries of Health and the ministries that govern professional education, such as the  
209 ministries of higher education and vocational training [12]. However, onboarding systems within the  
210 EPI need to be strengthened to provide newcomers with the necessary skills and competencies to

211 effectively do their jobs. The finding that a sizable proportion of staff at all levels have received in-  
212 service training is reassuring in the sense that it indicates that mechanisms/systems are in place which  
213 can support in-service training. Pre-service training is fundamental in the skills acquisition of EPI staff;  
214 however, they require additional in-service training, onboarding, and supportive supervision to carry  
215 out their vaccination tasks efficiently[13].

216 Table 3 emphasized the knowledge gaps of EPI staff, with topics such as AEFI, surveillance,  
217 Supplementary Immunization Activities, and cross-disciplinary skills such as planning, budgeting, and  
218 report writing less frequently conducted. It is worth highlighting that the percentages reported for the  
219 central level need to be viewed with caution for two reasons. First, some degree of functional  
220 specialization is expected at the central level, and therefore, it will not be uncommon to see that certain  
221 staff have not received in-service training on some aspects of immunization. For instance, finance staff  
222 are not expected to receive in-service training on cold chain or conducting EPI coverage surveys  
223 because they may not require this knowledge for their job. Second, of the 28 central staff interviewed,  
224 only 13 indicated that they received in-service, making it difficult to draw any meaningful conclusion  
225 from the observed findings. Despite this limitation, staff at this level are expected to have a solid mastery  
226 of cross-disciplinary skills, given their role in evidence-based strategy development. And the fact that  
227 none of the respondents from the central level reported being trained on most topics suggests that in-  
228 service training are rarely tailored to provide staff with the needed competencies to do their jobs  
229 effectively. Therefore, there is a need to develop a more comprehensive and tailored capacity-building  
230 plan that meets EPI staff's training needs sustainably, especially as respondents indicated the need for  
231 training in all thematic areas but with varying frequency across themes and levels (Table 4).

232

233 In this study, respondents considered self-paced printed resource material/book, classroom learning at  
234 the workplace, off-site classroom learning, on-the-job mentorship and direct supervision, and on-the-  
235 job quick reference material/job aids as top learning and work aids that could be employed to improve  
236 their skills. However, based on their perspective, self-paced and facilitated e-learning on a computer  
237 was the least effective. In all, the emphasis is on repetitive practical training approaches and regular

238 supervision, consistent with evidence developed by Julia et al. on recommended in-service training  
239 techniques based on an integrative literature review[14].  
240 Even with a state-of-the-art platform to support in-service training, some critical factors which pose  
241 serious hindrances to learning. Our study evaluated two core factors: staff motivation to learn and key  
242 challenges they feel could impact learning. With regards to motivation, financial incentive to learn was  
243 not among the leading motivation factors for all levels. Other factors, such as obtaining a certificate of  
244 completion, being recognized by the ministry, and consideration for promotion or attending an  
245 international meeting, received better ratings than financial incentives at all levels. In addition, over  
246 30% of participants at all levels indicated that positive performance reviews from a manager or  
247 supervisor could motivate them to acquire new knowledge/skills. Overall, these findings suggest that  
248 strategies for training should also consider non-financial incentives, such as certification, recognition  
249 by senior officials, and the institution of a system that can guarantee regular performance job reviews.  
250 This will be important to promote (1) a culture of self-learning and (2) potentially work toward cost-  
251 savings of training methods (Table 5). However, surveyed staff aligned mainly on four key factors that  
252 could impact learning - multiple meetings, high staff attrition, competing priorities, and team conflict.  
253 While the impact of these factors on staff professional development could not be overemphasized, it is  
254 important to recognize that these factors could threaten the program's overall performance. Therefore,  
255 addressing them- through optimal planning and prioritization- will enhance participants' ability to learn  
256 and improve the program's overall performance.

257

## 258 **Conclusion**

259 Overall, this study suggests that most EPI staff at the surveyed levels lack the requisite disciplinary and  
260 cross-disciplinary skills to effectively do their jobs. These capacity gaps, to a large extent, stem from  
261 weaknesses in pre-service and in-service training systems. According to our findings, training needs  
262 vary considerably across the different levels and within the units/ department, and only limited time is  
263 available for professional development. This variation implies that efforts need to be invested in  
264 developing a tailored capability-building program, which covers relevant immunization topics and  
265 cross-disciplinary skills for each level, and which staff sees as useful for their jobs. Also, to effectively

266 deal with the diversity of staff graduates from different training institutes at all levels, there is a need to  
267 institute a system that can guarantee targeted onboarding, mentoring, and performance review for new  
268 immunization staff. Our study raised crucial points on preferred learning methods and showed that  
269 factors such as obtaining a certificate of course completion are more motivating than providing financial  
270 incentives – which are useful for effectively planning EPI staff capability building programs.

271

## 272 **Recommendation**

273 Based on our findings, we recommend immunization stakeholders:

- 274 1. Establish a competency framework that clearly defines the knowledge, skills, attributes,  
275 structures, roles and approaches needed for people within EPI to effectively do their job.
- 276 2. Leverage the competency framework to upgrade the capability of existing staff on core  
277 disciplinary and cross-disciplinary skills that are indispensable for their day-to-day operations.
- 278 3. Establish a robust onboarding system for new employees to ensure that updated technical and  
279 management/communication resources are available for each post/role.
- 280 4. Upgrade and standardize the current performance review mechanisms at all levels, as this can  
281 be a good opportunity to identify and address capability-building needs.
- 282 5. Strengthen pre-service training by ensuring that core immunization aspects are sufficiently  
283 integrated into the curriculum of, at least nursing and medical schools.
- 284 6. Enhance in-service training, whenever it is considered, by adapting and applying adult learning  
285 theories, strengthening the capacity of instructors, and appropriately selecting trainees, amongst  
286 others.
- 287 7. Establish a monitoring and evaluation framework to gather key information from every training  
288 event and track training effectiveness. Develop a routine database to gather this key information  
289 from every training event.

## 290 **Limitation**

291 This assessment had four major methodological limitations. First, data were collected from 68 health  
292 districts, representing just 36% of health districts in the country. This limitation implies that this  
293 evaluation should not be considered a comprehensive presentation of the entire scope of capability gaps



294 at the district level. Moreso, the study is based on a need assessment conducted in 2016; thus may not  
295 represent the current reality. Second, as per the objective of the TNA, this evaluation did not evaluate  
296 capacity gaps at the health facility level, where capacity needs mostly revolve largely around clinical  
297 practices. As such, the findings are not applicable to this level. Third, most of the findings of this  
298 evaluation are largely based on recall and perceptions. Fourth, some staff at the central level did not  
299 respond to some questions, which implies that the results for some thematic areas may not represent the  
300 variables explored. However, given the emphasis of the evaluation on pre-service and in-service  
301 training, with a lens on disciplinary and cross-disciplinary skills, the authors are confident that these  
302 limitations have not undermined the findings – the scope of data collection allowed the assessment team  
303 to draw out conclusions across nine thematic areas that may be applicable to central, regional and  
304 districts levels.

#### 305 **Author contributions**

306 Conception & Design: AA, FZL, MV, JNM Statistical analysis: AA, JNM, MV, FZL Initial draft  
307 preparation: AA, SCN, JG, NNE Review and Editing: SCN, VNA, MCM, NB, BMN, STN, AAN,  
308 PDM, CT, YS Supervision: YS All Authors read and approved submission of the final article.

#### 309 **Ethics approval and consent to participate**

310 This study did not require ethical approval as it did not contain individual-level data collection.

#### 311 **Availability of data and materials**

312 Data used for this research is available from the corresponding author upon reasonable request.

#### 313 **Funding**

314 This research received no external funding.

#### 315 **Conflicts of Interest**

316 The authors declare no conflict of interest.

#### 317 **References**

- 318 1. Chard AN, Gacic-Dobo M, Diallo MS, Sodha SV, Wallace AS (2000) Routine Vaccination  
319 Coverage — Worldwide, 2019. *Morb Mortal Wkly Rep* 69:1706–1710
- 320 2. WHO Immunization Data portal.  
321 [https://immunizationdata.who.int/compare.html?COMPARISON=type1\\_\\_WIISE/MT\\_AD\\_COV\\_LONG+type2\\_\\_WIISE/MT\\_AD\\_COV\\_LONG+option1\\_\\_DTP\\_PLUS\\_coverage+option2\\_\\_DTP\\_coverage&CODE=CMR&YEAR=](https://immunizationdata.who.int/compare.html?COMPARISON=type1__WIISE/MT_AD_COV_LONG+type2__WIISE/MT_AD_COV_LONG+option1__DTP_PLUS_coverage+option2__DTP_coverage&CODE=CMR&YEAR=). Accessed 19 Aug 2023
- 324 3. Vandelaer J, Bilous J, Nshimirimana D (2008) Reaching Every District (RED) approach: a way  
325 to improve immunization performance. *Bull World Health Organ*;86(3):A-B:
- 326 4. Cameroon - urbanization 2022. In: Statista.  
327 <https://www.statista.com/statistics/446865/urbanization-in-cameroon/>. Accessed 19 Aug 2023
- 328 5. Vaccine Investment Strategy 2024. <https://www.gavi.org/our-alliance/strategy/vaccine-investment-strategy-2024>. Accessed 19 Aug 2023
- 330 6. Immunization Agenda 2030. <https://www.who.int/teams/immunization-vaccines-and-biologicals/strategies/ia2030>. Accessed 19 Aug 2023
- 332 7. Immunization coverage and vaccine-preventable diseases.  
333 [https://www.who.int/data/gho/data/themes/topics/sdg-target-3\\_b-development-assistance-and-vaccine-coverage](https://www.who.int/data/gho/data/themes/topics/sdg-target-3_b-development-assistance-and-vaccine-coverage). Accessed 19 Aug 2023
- 335 8. Yauba S, Harmelle EE, Marius VZ, et al (2019) Availability and Status of Vaccine Cold Chain  
336 Equipment in Cameroon. *J. Vaccines Vaccin*.
- 337 9. Woolforde L (2012) Onboarding Nurse Practitioners: A Healthcare System Approach to  
338 Interprofessional Education. *Nurse Lead* 10:32–35
- 339 10. Dansereau E, Miangotar Y, Squires E, et al (2017) Challenges to implementing Gavi’s health  
340 system strengthening support in Chad and Cameroon: results from a mixed-methods evaluation.  
341 *Glob Health* 13:83
- 342 11. Mutabaruka E, Nshimirimana D, Goilav C, Meheus A (2005) EPI training needs assessment in  
343 12 African countries, 2002-2004. *Publ Met UAntwerpen Adres* 3:14
- 344 12. Juma M, Masresha B, Adekola A, Dochez C (2022) Strengthening pre-service training of  
345 healthcare workers on immunisation and effective vaccine management: the experience of  
346 Kenya Medical Training College. *Pan Afr Med J* 41:
- 347 13. Nicol E, Turawa E, Bonsu G (2019) Pre- and in-service training of health care workers on  
348 immunization data management in LMICs: a scoping review. *Hum Resour Health* 17:92
- 349 14. Bluestone J, Johnson P, Fullerton J, Carr C, Alderman J, BonTempo J (2013) Effective in-  
350 service training design and delivery: evidence from an integrative literature review. *Hum Resour*  
351 *Health* 11:51

352
